# Supplementary material for: Occupational exposure to inorganic dust and risk of gout: a population-based study
Source: PubMed Central journal article supplement — RMD Open. 2020 Jul 20;6(2):e001178. doi: 10.1136/rmdopen-2020-001178 (PMC7425113; doi:10.1136/rmdopen-2020-001178), 2020-07-20
Supplement: rmdopen-2020-001178s001.pdf [file rmdopen-2020-001178s001.pdf]

## Selection of cases and controls

| <b>Supplementary Table 1</b>                                                          |                  |                     |
|---------------------------------------------------------------------------------------|------------------|---------------------|
|                                                                                       | <b>Cases (n)</b> | <b>Controls (n)</b> |
| All gout-cases diagnosed 2006-2012, no gout diagnosis 2000-2005, and matched controls | 7616             | 37147               |
| Cases not part of workforce and their matched controls                                | -1492            | -5935               |
| Controls not part of workforce                                                        |                  | -6138               |
| Cases with no remaining controls                                                      | -4               |                     |
| <b>Remaining</b>                                                                      | <b>6120</b>      | <b>25074</b>        |
| <b>Cases with ULT before index date and their matched controls</b>                    | <b>-1076</b>     | <b>-4290</b>        |
| <b>Controls with ULT before index date</b>                                            |                  | <b>-102</b>         |
| <b>Cases with no remaining controls</b>                                               | <b>-2</b>        |                     |
| <b>Remaining, included for analysis</b>                                               | <b>5042</b>      | <b>20682</b>        |

## Definition of comorbidities

Comorbidities and medication used in the analyses or for descriptive purposes were defined by the presence of ICD-codes and ATC-codes in the VEGA-database and the Prescriptive drug register respectively.

| <b>Supplementary table 2. Definition of comorbidities and medication use</b> |                       |                                                                                                          |
|------------------------------------------------------------------------------|-----------------------|----------------------------------------------------------------------------------------------------------|
| <b>Comorbidity/medication use</b>                                            | <b>ICD-10 code</b>    | <b>ATC code</b>                                                                                          |
| Hypertension                                                                 | I10-I15               |                                                                                                          |
| Use of diuretics                                                             |                       | C03A, C03B, C03C C07BB,<br>C09BA02/03/05/06/08/09/1<br>5, C09CA01, C09DA01-04,<br>C09DA06-07, C09XA52/54 |
| Obesity                                                                      | E66                   |                                                                                                          |
| Diabetes                                                                     | E10-14, O24           |                                                                                                          |
| Renal disease                                                                | N00-N08, N11-22       |                                                                                                          |
| Coronary heart disease (CHD)                                                 | I20-I25               |                                                                                                          |
| Atrial fibrillation                                                          | I48                   |                                                                                                          |
| Alcoholism                                                                   | Z72.1, F10            |                                                                                                          |
| Thromboembolism                                                              | I26, I70-I72, I80-I82 |                                                                                                          |
| Congestive heart failure (CHF)                                               | I50                   |                                                                                                          |
| Psoriasis                                                                    | L40                   |                                                                                                          |
| Stroke                                                                       | I60-I64, G45          |                                                                                                          |
| Chronic obstructive pulmonary disease (COPD)                                 | J44                   |                                                                                                          |

## Associations between comorbidities known to increase SU and gout risk with exposure to inorganic dust

| <b>Supplementary table 3. Crosstabulation of obesity and exposure to inorganic dust.</b> |               |             |
|------------------------------------------------------------------------------------------|---------------|-------------|
| Exposed to inorganic dust                                                                | Obesity       |             |
|                                                                                          | No            | Yes         |
| No                                                                                       | 21258 (95.4%) | 1026 (4.6%) |
| Yes                                                                                      | 8444 (94.8%)  | 466 (5.2%)  |
| Cochran-Armitage Trend Test. Two-sided P = 0.0193                                        |               |             |

| <b>Supplementary table 4. Crosstabulation of alcoholism and exposure to inorganic dust.</b> |               |            |
|---------------------------------------------------------------------------------------------|---------------|------------|
| Exposed to inorganic dust                                                                   | Alcoholism    |            |
|                                                                                             | No            | Yes        |
| No                                                                                          | 21816 (97.9%) | 468 (2.1%) |
| Yes                                                                                         | 8541 (95.9%)  | 369 (4.1%) |
| Cochran-Armitage Trend Test. Two-sided P = <0.0001                                          |               |            |

| <b>Supplementary table 5. Crosstabulation of renal disease and exposure to inorganic dust.</b> |               |             |
|------------------------------------------------------------------------------------------------|---------------|-------------|
| Exposed to inorganic dust                                                                      | Renal Disease |             |
|                                                                                                | No            | Yes         |
| No                                                                                             | 21345 (95.8%) | 939 (4.2%)  |
| Yes                                                                                            | 8512 (95.5%)  | 398 (4.47%) |
| Cochran-Armitage Trend Test. Two-sided P = 0.3188                                              |               |             |

...

| <b>Supplementary table 6</b> |
|------------------------------|
|------------------------------|

| <b>. Crosstabulation of psoriasis and exposure to inorganic dust.</b> |               |            |
|-----------------------------------------------------------------------|---------------|------------|
| Exposed to inorganic dust                                             | Psoriasis     |            |
|                                                                       | No            | Yes        |
| No                                                                    | 21653 (97.2%) | 631 (2.8%) |
| Yes                                                                   | 8672 (97.3%)  | 238 (2.7%) |
| Cochran-Armitage Trend Test. Two-sided P = 0.4366                     |               |            |
